# Supplementary material for: Deletion of Jazf1 gene causes early growth retardation and insulin resistance in mice
Source: PubMed Central journal article supplement — Proc Natl Acad Sci U S A. 2022 Nov 28;119(49):e2213628119. doi: 10.1073/pnas.2213628119 (PMC9894197; doi:10.1073/pnas.2213628119), 2022-11-28
Supplement: pnas.2213628119.sapp.pdf [file pnas.2213628119.sapp.pdf]

## Supporting Information for

### Deletion of *Jazf1* gene causes early growth retardation and insulin resistance in mice

Hui-Young Lee<sup>a,b,c</sup>, Hye Rim Jang<sup>a,b</sup>, Hui Li<sup>d</sup>, Varman T. Samuel<sup>e,f</sup>, Karrie D. Dudek<sup>g</sup>, Anna B. Osipovich<sup>h</sup>, Mark A. Magnuson<sup>h,1</sup>, Jeffrey Sklar<sup>i,1</sup>, and Gerald I. Shulman<sup>j,1</sup>

<sup>a</sup>Laboratory of Mitochondria and Metabolic Diseases, School of Medicine, Gachon University, Incheon 21999, Korea; <sup>b</sup>Department of Molecular Medicine, School of Medicine, Gachon University, Incheon 21999, Korea; <sup>c</sup>Korea Mouse Metabolic Phenotyping Center, Lee Gil Ya Cancer and Diabetes Institute, Gachon University, Incheon 21999, Korea; <sup>d</sup>Department of Pathology, University of Virginia, Charlottesville, VA 22908; <sup>e</sup>Department of Internal Medicine, Yale School of Medicine, New Haven, CT 06510; <sup>f</sup>West Haven Veterans Affairs Medical Center, West Haven, CT 06516; <sup>g</sup>Department of Cell and Developmental Biology, Vanderbilt University, Nashville TN 37232; <sup>h</sup>Department of Molecular Physiology and Biophysics, Vanderbilt University Nashville, TN 37232; <sup>i</sup>Department of Pathology, Yale School of Medicine, New Haven CT 06510; and <sup>j</sup>Department of Cellular & Molecular Physiology, Yale School of Medicine, New Haven, CT 06510

<sup>1</sup>To whom correspondence may be addressed. Email: [mark.magnuson@vanderbilt.edu](mailto:mark.magnuson@vanderbilt.edu), [jeffrey.sklar@yale.edu](mailto:jeffrey.sklar@yale.edu), or [gerald.shulman@yale.edu](mailto:gerald.shulman@yale.edu).

#### This PDF file includes:

Figures S1 to S4  
Tables S1 to S3

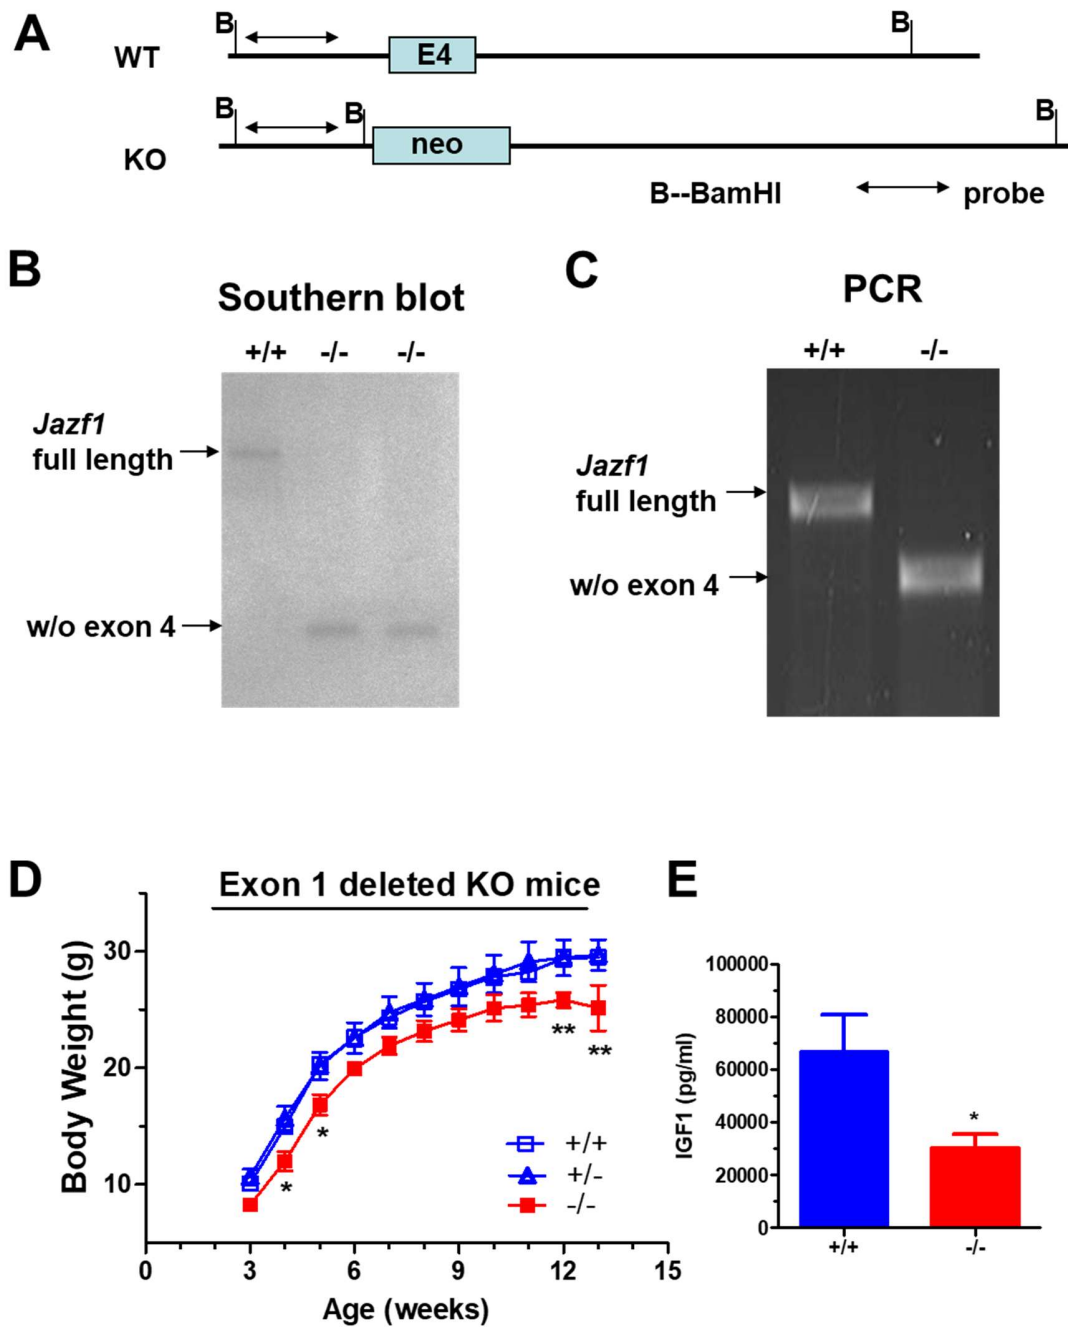

**Fig. S1. Construction of *Jazf1* KO mice. (A)** Genomic structure of the WT *Jazf1* locus surrounding exon 4(E4) and the neo cassette replacing exon 4 in the KO mice and BAMH1 restriction sites that distinguish the WT and KO alleles. Double-headed arrows indicate positions of probes used for Southern blot. **(B)** Correctly targeted ES cell clones were identified by Southern blot analysis using genomic DNA from *Jazf1* +/+ and KO strains were digested by BAMH1 and DNA illustrated in panel A, radiolabelled with <sup>32</sup>P. **(C)** PCR analysis of DNA using the primers illustrated in panel A. **(D)** Body weight curve of WT and *Jazf1* KO mice with 8bp deletion in exon 1. **(E)** Plasma IGF-1 concentration of WT and *Jazf1* KO mice with 8bp deletion in exon 1.

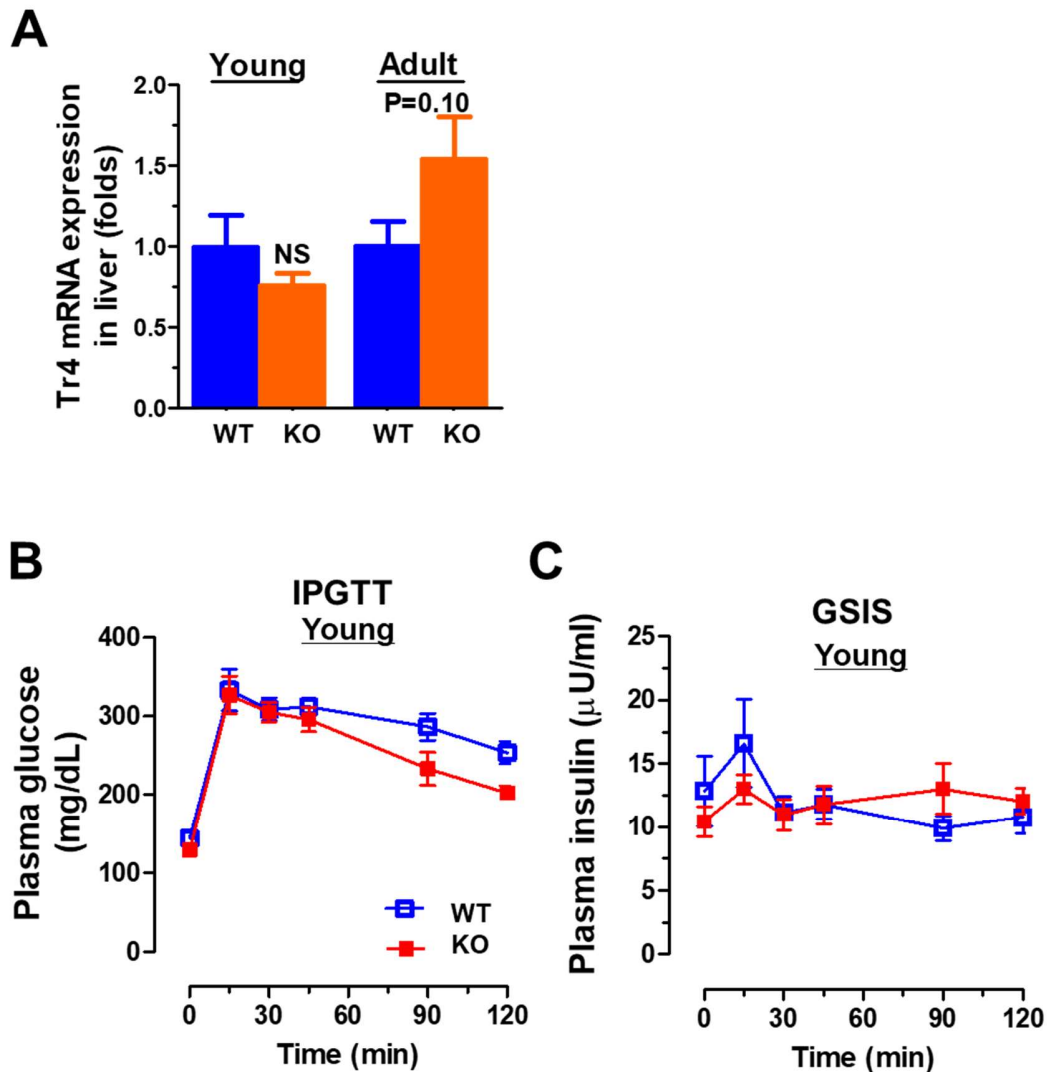

**Fig. S2. TR4 mRNA expression and glucose tolerance test in young animals. (A)** TR4 mRNA expression in liver from WT and KO mice in young (n=5-6 for each group). **(B)** Plasma glucose and **(C)** insulin concentration during IPGTT at age 3 months on regular chow (n=7-8 for each group). All data are mean  $\pm$  SEM. NS, not significant by two tailed student t-test, compared to WT mice.

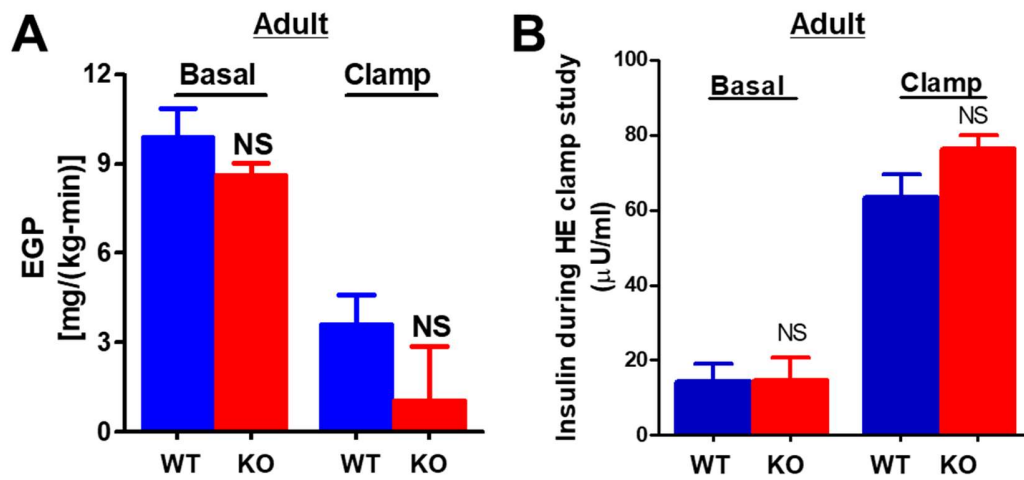

**Fig. S3. Hyperinsulinemic-euglycemic clamp study on regular chow in adult mice.** Animals were fed on regular chow and overnight fasted before hyperinsulinemic-euglycemic clamp study (n=5-6 for each group). The clamp study performed in 7 month-old *Jazf1* KO mice and age/weight-matched WT mice. **(A)** Basal and insulin suppressed endogenous glucose production (EGP) during the clamp study. **(B)** Plasma insulin concentration during the clamp study. All data are mean  $\pm$  SEM. NS, not significant by two tailed student t-test, compared to WT mice.

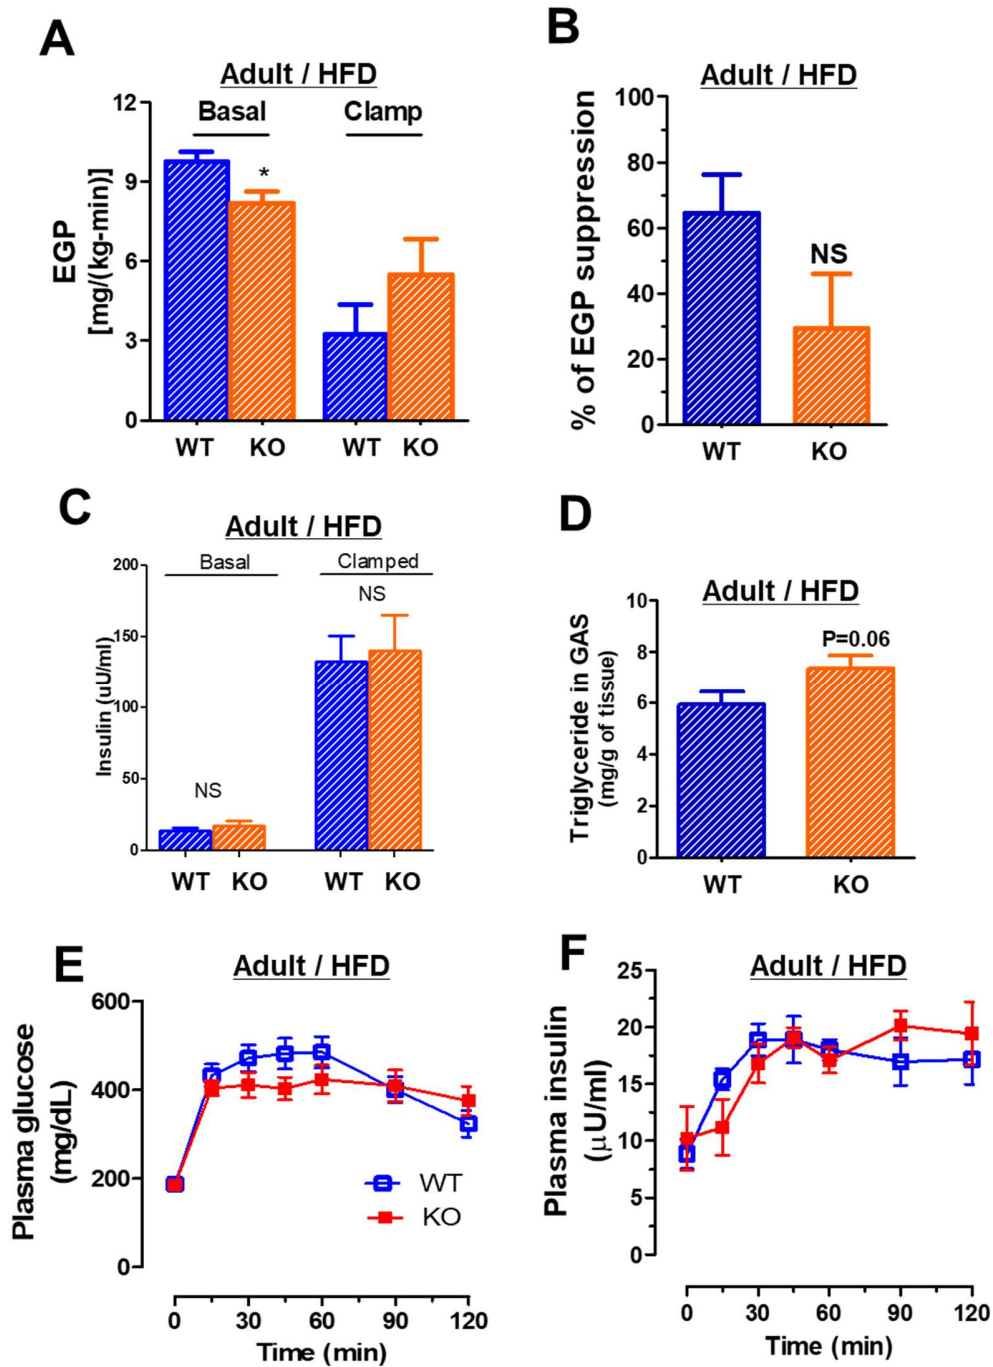

**Fig. S4. Hyperinsulinemic-euglycemic clamp study and glucose tolerance test on high-fat diet in adult mice.** Animals were fed on high fat diet for 4 weeks and overnight fasted before hyperinsulinemic-euglycemic clamp study. The clamp study performed in 7 month-old *Jazf1* KO mice and age-matched WT mice (n=9 for each group). **(A)** Basal and insulin suppressed (clamp) endogenous glucose production (EGP), **(B)** percentage suppression of EGP during clamp, **(C)** plasma insulin concentration in *Jazf1* KO mice and WT mice during the clamp study, **(D)** Intramuscular triglyceride content in gastrocnemius (GAS) muscle after the clamp study, **(E)** plasma glucose curve and **(F)** insulin concentration curve during IPGTT. All data are mean  $\pm$  SEM. \*P<0.05 by two tailed student t-test.

**Table S1.** 108 Up-regulated genes in *Jazf1* KO mouse liver compared to WT mouse liver (related to Fig.6A).

|    | Gene              | WT1     | WT2     | KO1      | KO2      | Mean fold |
|----|-------------------|---------|---------|----------|----------|-----------|
| 1  | Cyp2d9            | 11.05   | 54.83   | 3151.32  | 3750.57  | 176.82    |
| 2  | Hsd3b5            | 5.14    | 2.03    | 218.72   | 247.05   | 82.04     |
| 3  | Mup20             | 208.76  | 464.61  | 20577.61 | 29976.97 | 81.54     |
| 4  | Elovl3            | 25.31   | 18.82   | 1125.61  | 1137.77  | 52.47     |
| 5  | Serpina1e         | 250.00  | 894.67  | 7830.81  | 10280.11 | 21.41     |
| 6  | C6                | 30.83   | 37.22   | 325.27   | 471.03   | 11.60     |
| 7  | Cyp7b1            | 19.40   | 18.61   | 146.88   | 258.02   | 10.72     |
| 8  | Mup6              | 8.22    | 6.20    | 39.28    | 75.72    | 8.49      |
| 9  | Aox3              | 52.93   | 89.49   | 518.75   | 503.22   | 7.71      |
| 10 | Bcl6              | 5.78    | 4.80    | 38.01    | 42.16    | 7.68      |
| 11 | Hsd3b2            | 14.65   | 14.54   | 71.54    | 70.15    | 4.85      |
| 12 | Srd5a1            | 7.71    | 8.08    | 37.04    | 38.55    | 4.79      |
| 13 | Slco1a1           | 21.84   | 18.66   | 86.55    | 98.47    | 4.62      |
| 14 | Mup3              | 3737.44 | 5007.63 | 20026.30 | 19107.42 | 4.59      |
| 15 | Ces3a             | 213.26  | 278.33  | 980.90   | 1205.91  | 4.47      |
| 16 | Scp2              | 532.51  | 730.54  | 2645.49  | 2872.94  | 4.45      |
| 17 | C8a               | 76.44   | 154.96  | 419.21   | 523.58   | 4.43      |
| 18 | Serpine2          | 8.22    | 10.27   | 37.11    | 42.37    | 4.32      |
| 19 | Cela1             | 9.25    | 32.42   | 58.92    | 51.22    | 3.97      |
| 20 | Ces2c             | 18.37   | 27.94   | 76.91    | 96.45    | 3.82      |
| 21 | Ugt2b1            | 283.79  | 334.10  | 810.79   | 1351.57  | 3.45      |
| 22 | Ociad2            | 15.55   | 28.77   | 69.22    | 67.82    | 3.41      |
| 23 | Abcg2             | 15.16   | 37.01   | 70.49    | 67.45    | 3.24      |
| 24 | Nudt7             | 421.64  | 451.22  | 1178.26  | 1630.07  | 3.20      |
| 25 | Clk1              | 17.86   | 22.36   | 76.24    | 46.56    | 3.18      |
| 26 | 1600002<br>H07Rik | 9.89    | 9.12    | 30.69    | 29.22    | 3.15      |
| 27 | 2310001<br>H17Rik | 6.94    | 24.29   | 33.30    | 33.19    | 3.08      |
| 28 | Sdr9c7            | 81.45   | 62.13   | 137.17   | 258.87   | 2.93      |
| 29 | Pgp               | 10.79   | 12.77   | 35.40    | 30.76    | 2.84      |
| 30 | Vmo1              | 7.84    | 10.27   | 23.82    | 23.92    | 2.68      |
| 31 | Clec2h            | 6.81    | 6.78    | 17.70    | 18.40    | 2.66      |
| 32 | C9                | 246.66  | 295.37  | 543.69   | 898.95   | 2.62      |
| 33 | Arsa              | 14.52   | 16.84   | 39.73    | 40.94    | 2.58      |
| 34 | Cyp2f2            | 817.45  | 881.43  | 1888.02  | 2450.43  | 2.54      |
| 35 | Tmem19            | 26.21   | 34.77   | 76.17    | 74.87    | 2.53      |
| 36 | Chpt1             | 46.25   | 86.94   | 151.36   | 153.09   | 2.52      |
| 37 | Car3              | 2595.86 | 3723.20 | 7941.70  | 7285.64  | 2.51      |
| 38 | Fxn               | 6.30    | 9.96    | 22.25    | 14.21    | 2.48      |

|    |          |        |        |        |        |      |
|----|----------|--------|--------|--------|--------|------|
| 39 | Hao1     | 109.46 | 125.46 | 273.90 | 302.35 | 2.46 |
| 40 | Slc41a2  | 9.89   | 8.34   | 21.21  | 23.07  | 2.45 |
| 41 | Ccnh     | 7.32   | 10.89  | 21.66  | 21.21  | 2.45 |
| 42 | Slc22a7  | 17.22  | 19.34  | 45.85  | 40.41  | 2.38 |
| 43 | Enpp2    | 5.65   | 11.42  | 20.76  | 12.25  | 2.37 |
| 44 | Gm6637   | 7.07   | 2.35   | 6.50   | 8.80   | 2.34 |
| 45 | Stbd1    | 44.07  | 40.19  | 87.96  | 107.06 | 2.33 |
| 46 | Mrpl20   | 7.97   | 15.22  | 25.99  | 21.21  | 2.33 |
| 47 | Fn3k     | 7.32   | 5.00   | 13.37  | 14.16  | 2.33 |
| 48 | Cyp2c67  | 314.24 | 286.15 | 633.22 | 754.88 | 2.33 |
| 49 | Qprt     | 93.01  | 94.18  | 201.09 | 233.26 | 2.32 |
| 50 | Sh3glb2  | 5.40   | 5.63   | 14.19  | 11.24  | 2.31 |
| 51 | Fam195a  | 22.48  | 25.90  | 66.16  | 43.53  | 2.31 |
| 52 | Aox1     | 22.61  | 29.71  | 61.98  | 55.89  | 2.31 |
| 53 | Neat1    | 5.78   | 1.67   | 8.59   | 5.20   | 2.30 |
| 54 | Hspb6    | 6.42   | 6.31   | 14.04  | 15.11  | 2.29 |
| 55 | Slc10a2  | 6.04   | 6.98   | 15.16  | 14.21  | 2.27 |
| 56 | Mea1     | 13.23  | 23.77  | 42.12  | 32.08  | 2.27 |
| 57 | Cox7a2   | 273.38 | 705.78 | 973.73 | 671.04 | 2.26 |
| 58 | C8b      | 278.01 | 479.73 | 682.13 | 975.94 | 2.24 |
| 59 | Minos1   | 26.98  | 57.70  | 89.61  | 65.22  | 2.23 |
| 60 | Per1     | 7.58   | 5.00   | 8.89   | 16.28  | 2.21 |
| 61 | Ndufs6   | 253.86 | 403.27 | 709.84 | 654.82 | 2.21 |
| 62 | Snord118 | 15.80  | 6.57   | 21.21  | 20.10  | 2.20 |
| 63 | Fkbp11   | 19.14  | 35.03  | 46.82  | 68.40  | 2.20 |
| 64 | Jtb      | 21.71  | 70.73  | 74.30  | 67.08  | 2.19 |
| 65 | Gstk1    | 31.86  | 56.92  | 101.63 | 67.18  | 2.19 |
| 66 | Hes6     | 10.54  | 17.10  | 24.57  | 34.79  | 2.18 |
| 67 | Aff4     | 7.71   | 8.03   | 17.55  | 16.54  | 2.17 |
| 68 | Fermt2   | 22.87  | 96.74  | 83.78  | 64.74  | 2.17 |
| 69 | Smim4    | 64.49  | 68.18  | 159.50 | 126.73 | 2.17 |
| 70 | Ugt2b35  | 109.33 | 80.63  | 205.20 | 197.79 | 2.16 |
| 71 | Ugdh     | 46.64  | 69.79  | 126.50 | 112.15 | 2.16 |
| 72 | Slc35g1  | 12.21  | 10.11  | 17.77  | 28.74  | 2.15 |
| 73 | Ftcd     | 34.43  | 24.86  | 67.35  | 58.12  | 2.15 |
| 74 | Gm40826  | 5.01   | 13.76  | 15.46  | 16.60  | 2.15 |
| 75 | Ube2a    | 11.69  | 33.57  | 39.43  | 30.28  | 2.14 |
| 76 | Map1lc3a | 14.13  | 14.07  | 32.11  | 27.95  | 2.13 |
| 77 | Tspan33  | 11.05  | 10.89  | 18.89  | 27.47  | 2.12 |
| 78 | Dad1     | 16.96  | 68.28  | 58.92  | 51.38  | 2.11 |
| 79 | Slc2a1   | 5.01   | 3.91   | 10.53  | 8.27   | 2.11 |
| 80 | Gm38426  | 13.10  | 7.51   | 16.95  | 21.90  | 2.11 |
| 81 | Vegfb    | 7.71   | 6.05   | 14.04  | 14.37  | 2.10 |

|     |                   |        |        |        |        |      |
|-----|-------------------|--------|--------|--------|--------|------|
| 82  | Sertad1           | 8.74   | 8.18   | 15.53  | 19.78  | 2.10 |
| 83  | Gdf15             | 5.52   | 4.54   | 11.50  | 9.44   | 2.08 |
| 84  | Cyp8b1            | 128.73 | 509.54 | 432.50 | 408.51 | 2.08 |
| 85  | 2010320<br>M18Rik | 6.04   | 14.54  | 19.56  | 13.20  | 2.07 |
| 86  | Myeov2            | 75.16  | 200.15 | 241.42 | 186.17 | 2.07 |
| 87  | Tpmt              | 48.43  | 66.92  | 115.07 | 116.34 | 2.06 |
| 88  | Lrrc16a           | 6.81   | 5.84   | 14.79  | 11.24  | 2.05 |
| 89  | Gas2              | 37.51  | 60.83  | 99.09  | 88.50  | 2.05 |
| 90  | Oaf               | 24.41  | 63.75  | 71.39  | 74.55  | 2.05 |
| 91  | Keg1              | 99.56  | 102.99 | 209.38 | 204.04 | 2.04 |
| 92  | Fam188a           | 16.06  | 41.91  | 50.18  | 40.14  | 2.04 |
| 93  | Fam213b           | 12.21  | 13.14  | 27.78  | 23.70  | 2.04 |
| 94  | Fmo5              | 348.54 | 490.83 | 808.33 | 863.53 | 2.04 |
| 95  | Mrpl34            | 26.34  | 30.75  | 65.34  | 49.05  | 2.04 |
| 96  | Guk1              | 7.97   | 29.92  | 25.46  | 26.25  | 2.04 |
| 97  | Rnaseh2c          | 16.32  | 16.78  | 35.99  | 31.29  | 2.04 |
| 98  | Cdh1              | 14.65  | 22.83  | 33.23  | 40.83  | 2.03 |
| 99  | Rarres1           | 20.43  | 41.23  | 47.64  | 71.00  | 2.03 |
| 100 | Anapc16           | 7.32   | 14.49  | 19.56  | 19.99  | 2.03 |
| 101 | Prmt1             | 16.32  | 25.49  | 41.97  | 37.38  | 2.02 |
| 102 | Ndufa13           | 289.70 | 310.96 | 652.56 | 552.05 | 2.01 |
| 103 | Gpr155            | 20.17  | 27.52  | 48.84  | 44.06  | 2.01 |
| 104 | Clk4              | 9.25   | 17.62  | 26.29  | 20.57  | 2.00 |
| 105 | Tiam2             | 15.03  | 7.87   | 13.14  | 24.60  | 2.00 |
| 106 | Car1              | 9.12   | 13.08  | 20.09  | 23.49  | 2.00 |
| 107 | Alas2             | 73.23  | 30.70  | 84.90  | 87.02  | 2.00 |
| 108 | Sirt3             | 13.10  | 36.75  | 40.55  | 32.98  | 2.00 |



**Table S2.** Gene ontology (GO) terms enriched in the 108 up-regulated genes from *Jazf1* KO mouse liver (related to Fig.6B).

| GO ID      | GO Term                                                                                    | P value |
|------------|--------------------------------------------------------------------------------------------|---------|
| GO:0035634 | response to stilbenoid                                                                     | 0.00001 |
| GO:0072523 | purine-containing compound catabolic process                                               | 0.00158 |
| GO:0006957 | complement activation, alternative pathway                                                 | 0.00004 |
| GO:0010039 | response to iron ion                                                                       | 0.00116 |
| GO:0033559 | unsaturated fatty acid metabolic process                                                   | 0.00023 |
| GO:0019369 | arachidonic acid metabolic process                                                         | 0.00307 |
| GO:0035383 | thioester metabolic process                                                                | 0.00105 |
| GO:0006637 | acyl-CoA metabolic process                                                                 | 0.00105 |
| GO:0033574 | response to testosterone                                                                   | 0.00350 |
| GO:0060416 | response to growth hormone                                                                 | 0.00055 |
| GO:0048512 | circadian behavior                                                                         | 0.00053 |
| GO:0045475 | locomotor rhythm                                                                           | 0.00055 |
| GO:1905953 | negative regulation of lipid localization                                                  | 0.00242 |
| GO:0010883 | regulation of lipid storage                                                                | 0.00280 |
| GO:0010888 | negative regulation of lipid storage                                                       | 0.00047 |
| GO:0045912 | negative regulation of carbohydrate metabolic process                                      | 0.00036 |
| GO:0031649 | heat generation                                                                            | 0.00071 |
| GO:0009060 | aerobic respiration                                                                        | 0.00006 |
| GO:0010677 | negative regulation of cellular carbohydrate metabolic process                             | 0.00027 |
| GO:0051055 | negative regulation of lipid biosynthetic process                                          | 0.00381 |
| GO:0070584 | mitochondrion morphogenesis                                                                | 0.00004 |
| GO:0010907 | positive regulation of glucose metabolic process                                           | 0.00293 |
| GO:0006094 | gluconeogenesis                                                                            | 0.00113 |
| GO:0006111 | regulation of gluconeogenesis                                                              | 0.00032 |
| GO:0045721 | negative regulation of gluconeogenesis                                                     | 0.00002 |
| GO:0061179 | negative regulation of insulin secretion involved in cellular response to glucose stimulus | 0.00039 |
| GO:0046676 | negative regulation of insulin secretion                                                   | 0.00413 |

**Table S3.** Sequence for RT-PCR primers used in this study.

| <b>Gene</b>     | <b>Forward primer<br/>(5' to 3')</b> | <b>Reverse primer<br/>(5' to 3')</b> |
|-----------------|--------------------------------------|--------------------------------------|
| Tr4             | CATATTCACCACCTCGGACAAC               | TGACGCCACAGACCACA                    |
| Igf-1           | GGACCAGAGACCCTTTGCGGGG               | GGCTGCTTTTGTAGGCTTCAGTGG             |
| Igf-1r          | ATGACCCAGGGGAGGCTGTGTA               | CTTCAGCTTTGCAGGTGCACG                |
| Igfbp3          | TGCCGCCCTTCCAAAGGCAG                 | GGCTCTGCACGCTGAGGCAA                 |
| Ghr             | TTAGTTTGACCGGGATTTCGTGG              | AATCTTTGGAAGTGGGACTGGG               |
| JAZF1           | ATCGAGCACATCGAGGACAAC                | GAGCTTCGGCTGAATCTTCTT                |
| $\beta$ - actin | TGTGCCCATCTACGAGGGGTATGC             | GGTACATGGTGGTGCCGCCAGACA             |

Testicular receptors 4 (Tr4), Insulin-like growth factor 1 (Igf-1), IGF-1 receptor (Igf-1r), Insulin-like growth factor-binding protein 3 (Igfbp3), Growth hormone receptor (Ghr)
